# Supplementary material for: Identification of Aryl Polyamines Derivatives as Anti-Trypanosoma cruzi Agents Targeting Iron Superoxide Dismutase
Source: MDPI journal article supplement (doi:10.3390/pharmaceutics15010140), 2022-12-31
Supplement: s1 [file s1]

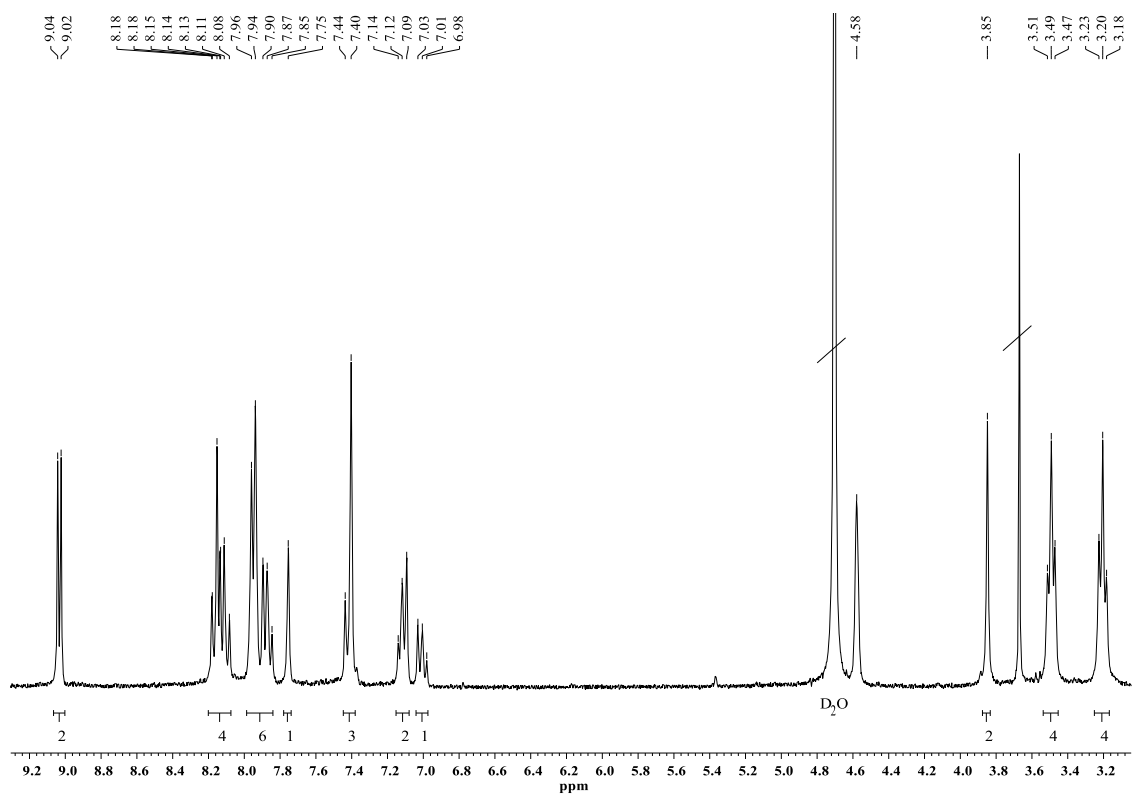

Figure S1. <sup>1</sup>H NMR spectra of compound 4.

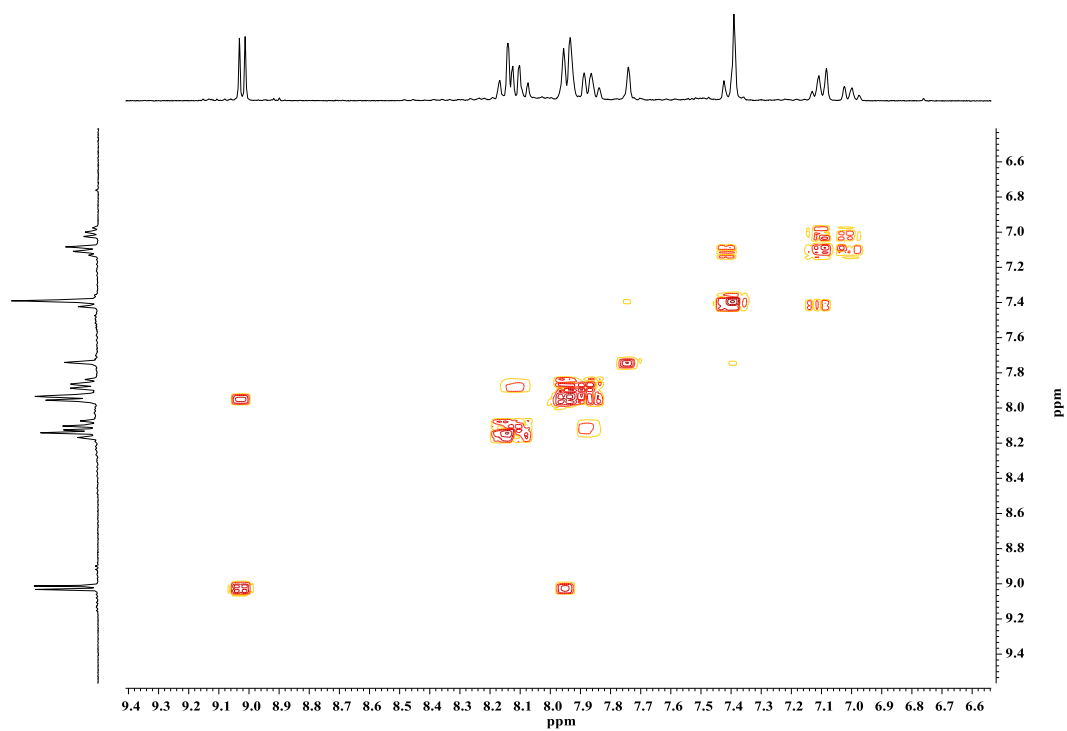

Figure S2. Homonuclear correlation <sup>1</sup>H-<sup>1</sup>H COSY spectra of compound 4.

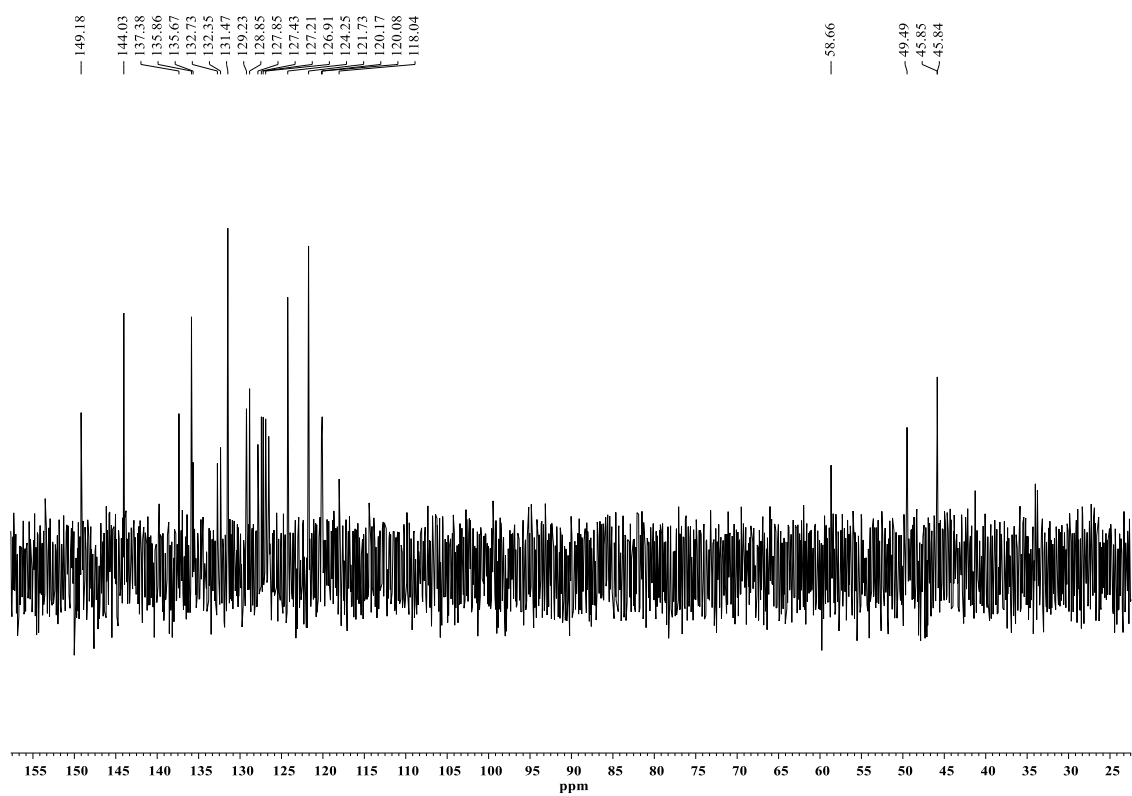

**Figure S3.**  $^{13}\text{C}$  NMR spectra of compound **4**.

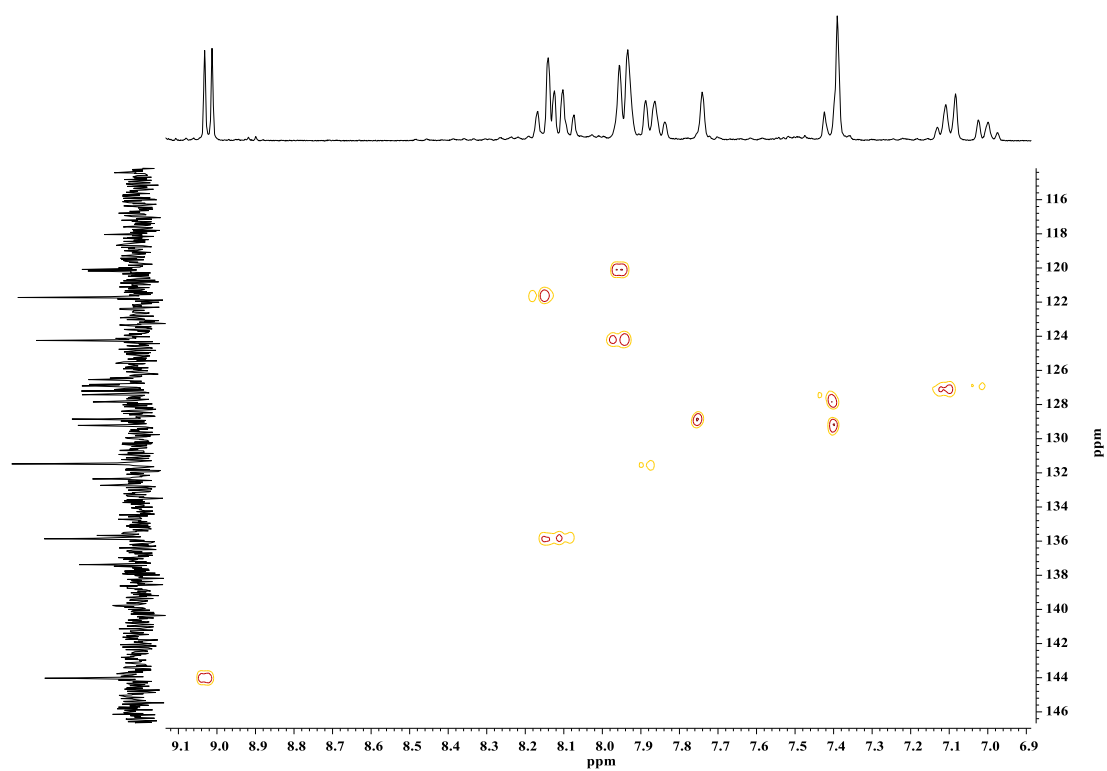

**Figure S4.** Heteronuclear correlation  $^1\text{H}$ - $^{13}\text{C}$  HSQC spectra of compound **4**.

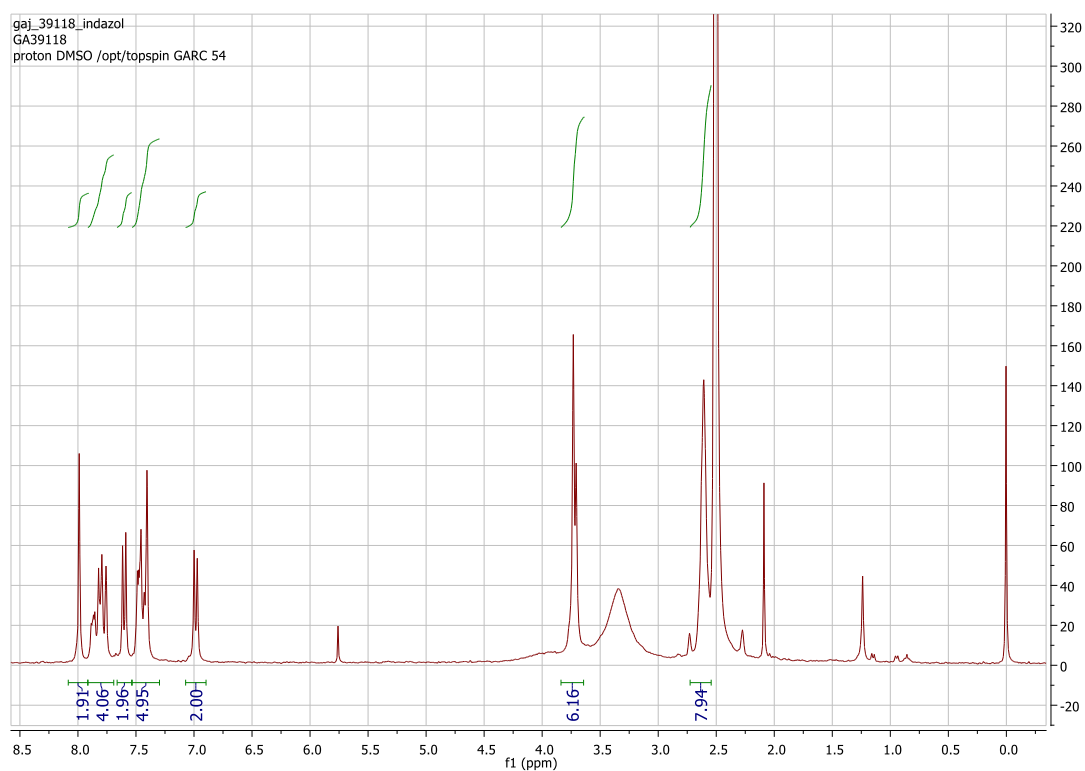

**Figure S5.**  $^1\text{H}$  NMR spectra of compound 5.

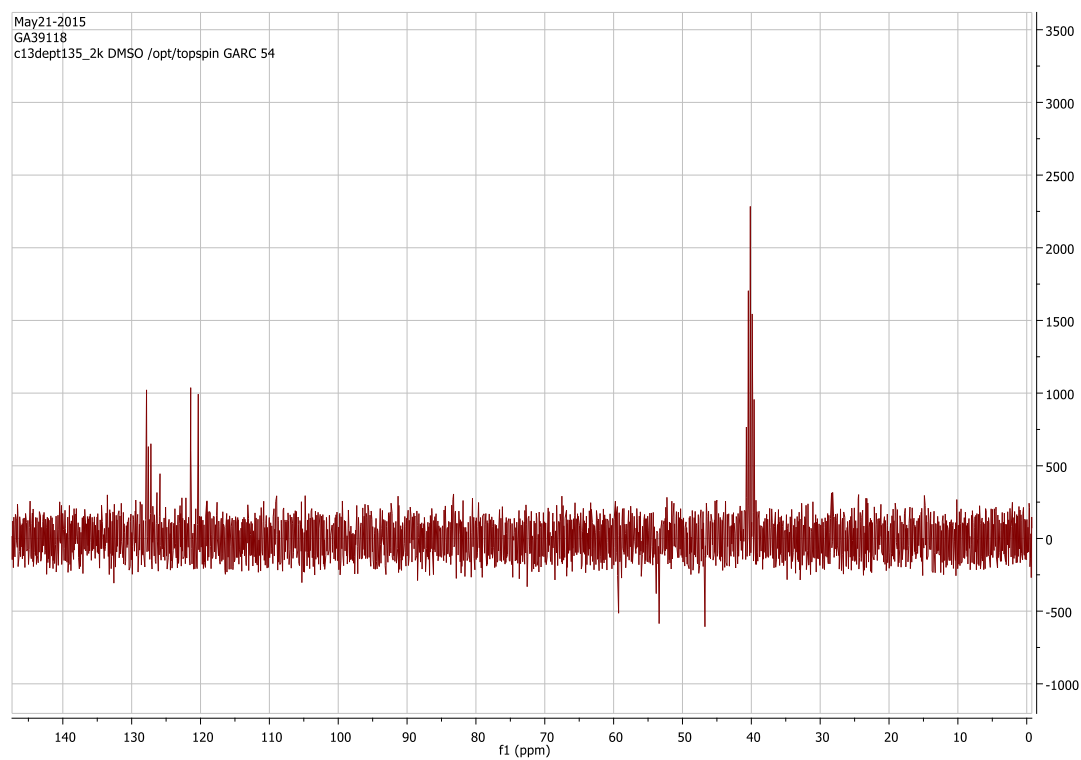

**Figure S6.** DEPT NMR spectra of compound 5.

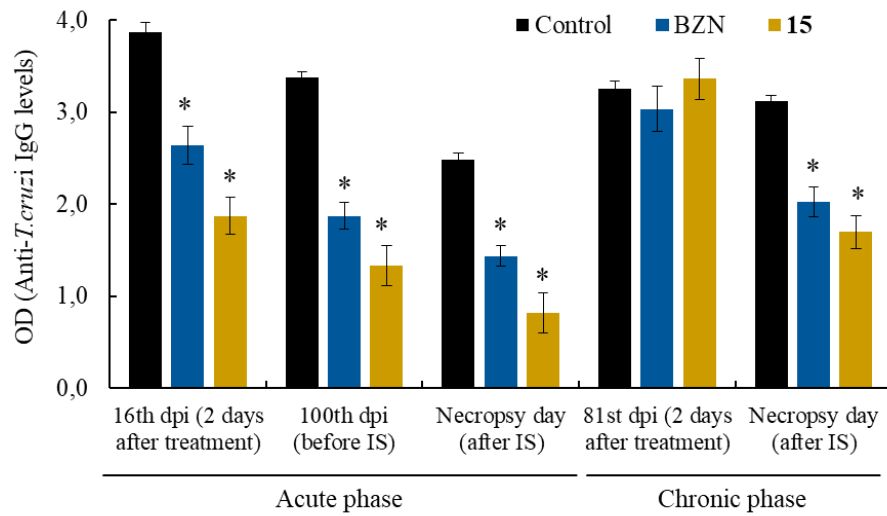

**Figure S7.** Anti-*Trypanosoma cruzi* immunoglobulin G (IgG) of mice treated during the acute and chronic infection: control, benznidazole (BZN) and 15. The value is the mean of three mice  $\pm$  standard deviation. (IS) immunosuppression. \* Significant differences between control and treated mice for  $\alpha = 0.05$ .

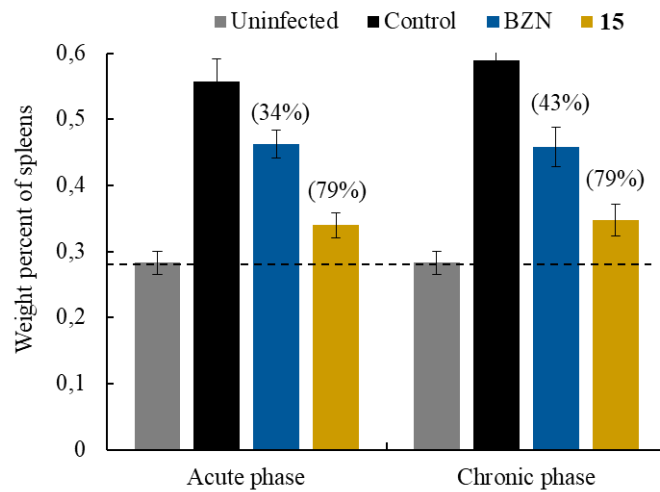

**Figure S8.** Weight percentage of spleens of mice treated during the acute and chronic infection: control, benznidazole (BZN) and 15. The value is the mean of three mice  $\pm$  standard deviation. (IS) immunosuppression. In brackets: reduction of splenomegaly in comparison to the control. Significant differences between control and treated mice for  $\alpha = 0.05$ .

**Table S1.** Biochemical clinical parameters for each group of mice: uninfected, control, benznidazole and **15**.

|                                         |                                                                        | Kidney marker profile |                | Heart marker profile |                  | Liver marker profile |            |                   |               |
|-----------------------------------------|------------------------------------------------------------------------|-----------------------|----------------|----------------------|------------------|----------------------|------------|-------------------|---------------|
|                                         |                                                                        | Urea                  | Uric acid      | CK-MB                | LDH              | AST/GOT              | ALT/GPT    | Total bilirubin   | ALP           |
|                                         |                                                                        | (mg/dL)               | (mg/dL)        | (U/L)                | (U/L)            | (U/L)                | (U/L)      | (mg/dL)           | (U/L)         |
| <b>Uninfected mice (n = 15)</b>         |                                                                        | 35 [32–40]            | 4.5 [4.0 –5.1] | 372 [150–630]        | 3180 [2505–3851] | 153 [132–177]        | 55 [46–62] | 0.28 [0.22 –0.31] | 169 [141–192] |
| <b>Treatment<br/>in acute<br/>phase</b> | 16 <sup>th</sup> dpi (Control)<br>(n = 3)                              | 31                    | 4.3            | 535                  | 3275             | 167                  | 60         | 0.23              | 180           |
|                                         | 16 <sup>th</sup> dpi and BZN (2 days after<br>treatment) (n = 3)       | ---                   | ----           | =                    | =                | ++++                 | ++++       | ++                | ++            |
|                                         | 16 <sup>th</sup> dpi and <b>15</b> (2 days after<br>treatment) (n = 3) | -                     | --             | --                   | =                | ++                   | ++         | +                 | =             |
|                                         | Necropsy day of mice (Control)<br>(n = 3)                              | 34                    | 4.0            | 496                  | 2761             | 179                  | 49         | 0.21              | 161           |
|                                         | Necropsy day of mice and BZN<br>(n = 3)                                | ---                   | =              | =                    | =                | ++++                 | =          | +                 | =             |
|                                         | Necropsy day of mice and <b>15</b><br>(n = 3)                          | =                     | =              | =                    | =                | +                    | +          | +                 | =             |
| <b>Treatment<br/>in chronic<br/>pha</b> | 81 <sup>th</sup> dpi (Control)<br>(n = 3)                              | 45                    | 5.7            | 751                  | 5951             | 260                  | 57         | 0.25              | 167           |
|                                         | 81 <sup>th</sup> dpi and BZN (2 days after                             | ---                   | ----           | --                   | ---              | ++                   | ++         | +++               | ++++          |

|  |                                                                 |     |     |     |      |     |    |      |     |
|--|-----------------------------------------------------------------|-----|-----|-----|------|-----|----|------|-----|
|  | treatment) (n = 3)                                              |     |     |     |      |     |    |      |     |
|  | 81 <sup>th</sup> dpi and 15 (2 days after<br>treatment) (n = 3) | --  | --- | -   | =    | +   | +  | ++   | =   |
|  | Necropsy day of mice (Control)<br>(n = 3)                       | 37  | 4.8 | 538 | 6679 | 286 | 64 | 0.20 | 149 |
|  | Necropsy day of mice and BZN<br>(n = 3)                         | --- | --  | =   | --   | +   | =  | ++   | ++  |
|  | Necropsy day of mice and 15<br>(n = 3)                          | -   | -   | =   | =    | =   | =  | +    | =   |

ALP, Alkaline phosphatase; ALT/GPT, alanine aminotransferase; AST/GOT, aspartate aminotransferase; CK-MB, creatine kinase-muscle/brain; LDH, lactate dehydrogenase; BZN, benznidazole; dpi, day post-infection.

Key: =, variation ≤ 10%; +/-, 10-20% increase/decrease over the range; ++/--, 20-30% increase/decrease over the range; +++/---, 30-40% increase/decrease over the range; ++++/----, > 40% increase/decrease over the range.
